# Supplementary material for: Structural insights into spliceosome fidelity: DHX35–GPATCH1- mediated rejection of aberrant splicing substrates
Source: Springer Nature journal article supplement (doi:10.1038/s41422-025-01084-w), 2025-02-28
Supplement: MOESM10 [file 41422_2025_1084_MOESM10_ESM.pdf]

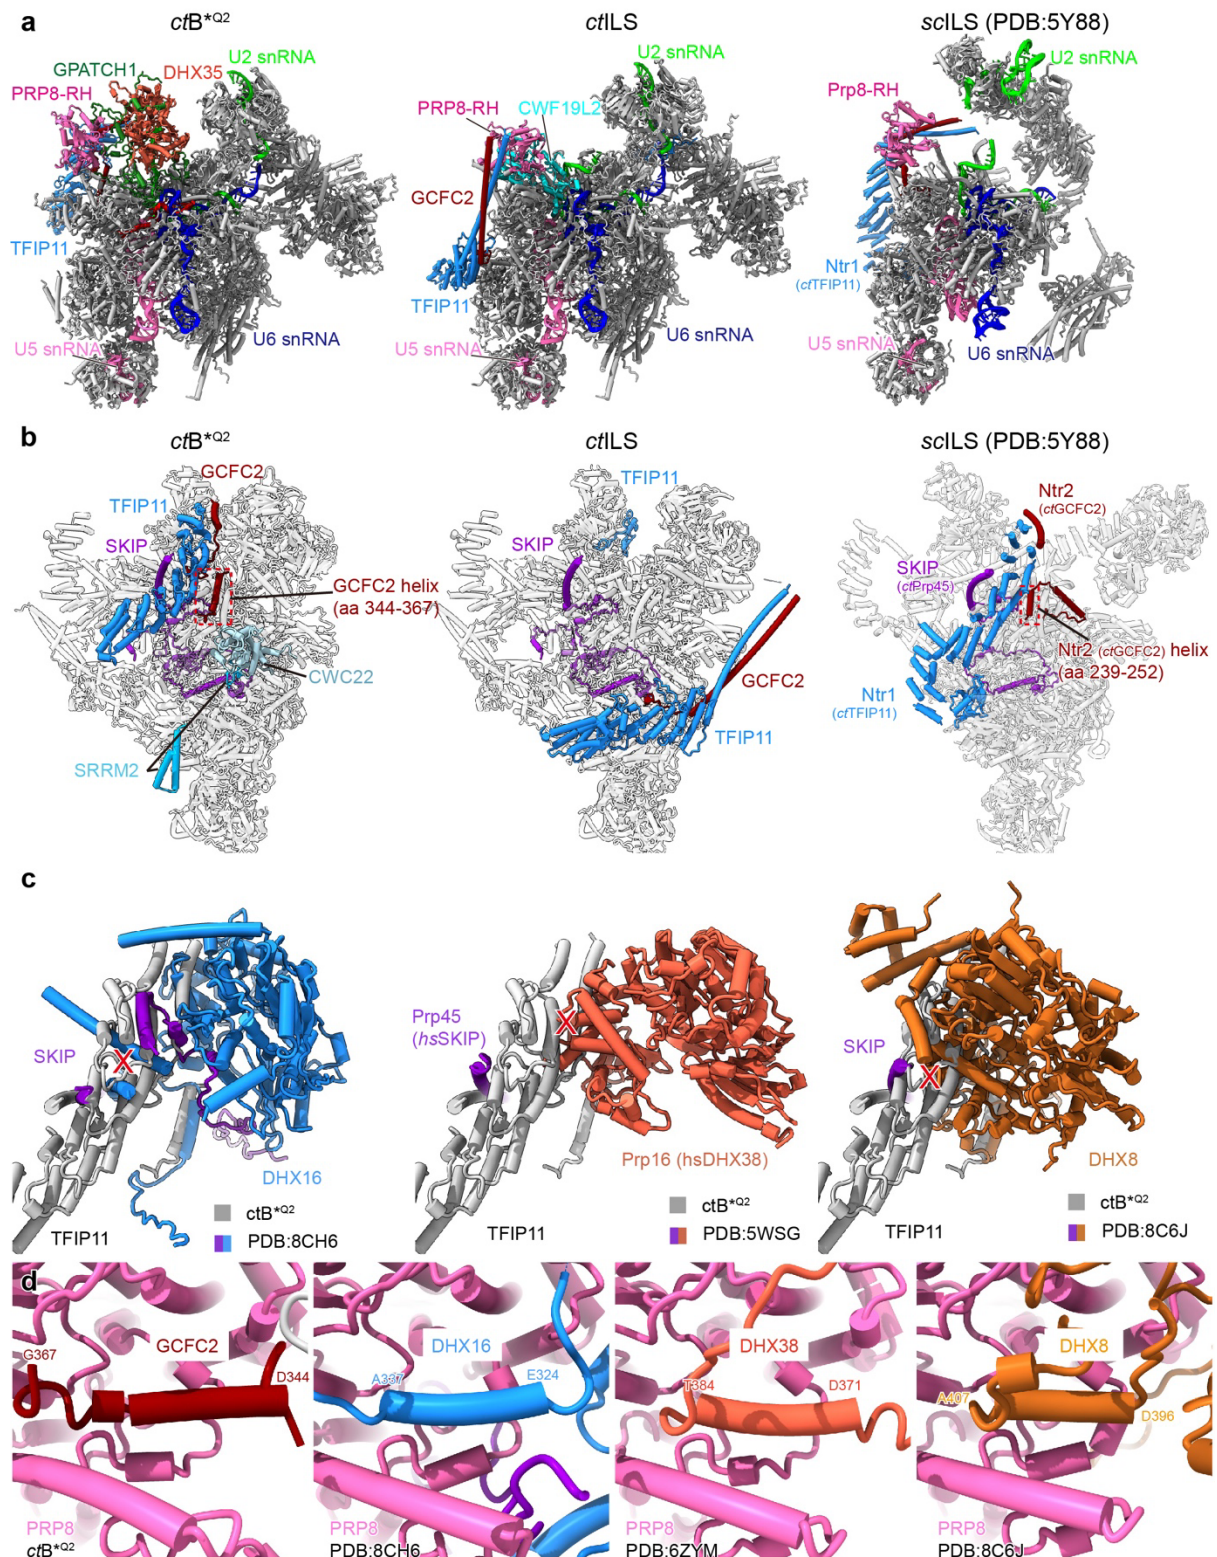

**Figure S10: Structural comparison of the *ctB*<sup>\*Q2</sup>, *ctILS* and *scILS* complexes.**

**a**, Differences between *ctB*<sup>\*Q2</sup> (left), *ctILS* (middle) and *scILS* (right) are highlighted: PRP8-RH domain (hot pink), GPATCH1 (green), DHX35 (tomato red), and CWF19 (green). **b**, Comparison of the position of the TFIP11-GCFC2 dimer in the *ctB*<sup>\*Q2</sup> (left), *ctILS* (middle) and *scILS* (right) complexes. SRRM2 and CWC22 are present in *ctB*<sup>\*Q2</sup>

(left) but missing in *ctf*LS (right). Notably, TFIP11 binds to a similar region in *ctB*<sup>\*Q2</sup> as it does in baker's yeast *scf*LS state. **c**, Overlay of TFIP11 from *ctB*<sup>\*Q2</sup> with the position of DHX16 (left, PDB: 8CH6), DHX38 (middle, PDB: 5WSG) and DHX8 (right, PDB: 8C6J) during B<sup>act</sup> and C\* complexes. **d**, Close-up view of the steric clash between GCFC2 (left, aa 344-367) and the binding sites for DHX16 (aa 324-337, PDB: 8CH6), DHX38 (aa 371-384, PDB: 6ZYM) and DHX8 (aa 396-407, PDB: 8C6J).
